# Supplementary material for: Hippocampal place cells have goal-oriented vector fields during navigation
Source: PubMed Central journal article supplement (PMC9329099; doi:10.1038/s41586-022-04913-9), 2022-07-06
Supplement: 41586_2022_4913_MOESM1_ESM.pdf [file 41586_2022_4913_MOESM1_ESM.pdf]

**Supplementary information**

---

**Hippocampal place cells have goal-oriented vector fields during navigation**

---

In the format provided by the authors and unedited

1 **Supplemental Information**

2

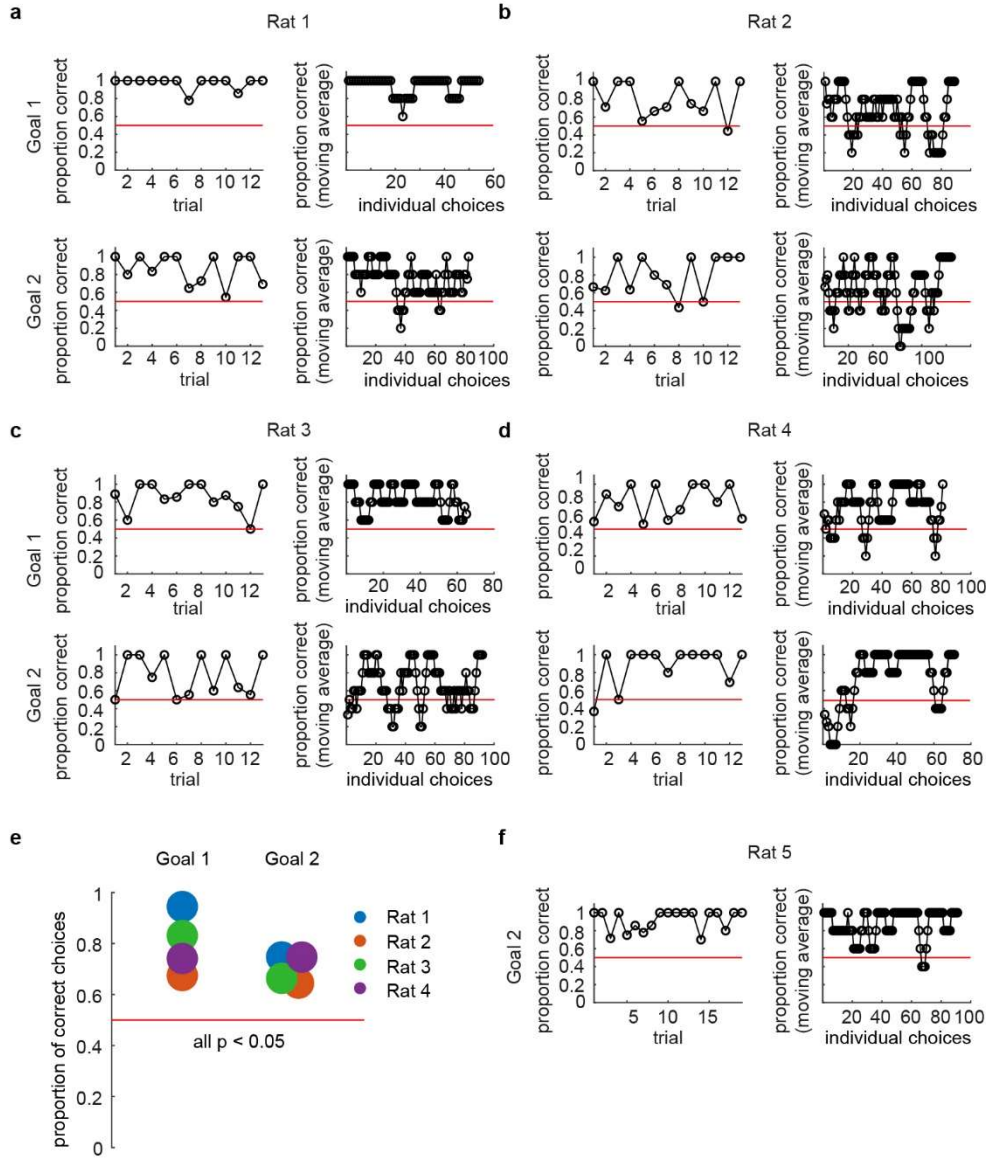

3

4 **Supplemental Figure 1 | Animals successfully navigated to new goal locations**

5 **in the goal switch sessions. a**, Top left, Proportion of choices that were correct to  
6 Goal 1 averaged by trial for rat 1. Top right, Running average of correct choices  
7 (averages of every 5 consecutive choices) to Goal 1 for rat 1. Bottom right and left,  
8 as at top, but to Goal 2. **b-d**, As in (a) for rats 2, 3, and 4, respectively. **e**, The total

9 proportion of correct choices for each rat for goals 1 and 2. Each rat made  
10 significantly more correct than incorrect choices for both goals; Rat 1, goal 1:  $p =$   
11  $2.92 \times 10^{-12}$ , goal 2:  $p = 7.51 \times 10^{-6}$ ; Rat 2, goal 1:  $p = 0.0013$ , goal 2:  $p = 0.0042$ ; Rat  
12 3, goal 1:  $p = 6.03 \times 10^{-8}$ , goal 2:  $p = 0.0023$ ; Rat 4, goal 1:  $p = 1.69 \times 10^{-5}$ , goal 2:  $p$   
13  $= 3.88 \times 10^{-5}$ ; two-sided binomial test within each animal. **f**, Rat 5's behavioural  
14 performance after a week of training to Goal 2. Left, Proportion of choices that were  
15 correct to Goal 2 averaged by trial. Right, Running average of correct choices  
16 (averages of every 5 consecutive choices) to Goal 2.

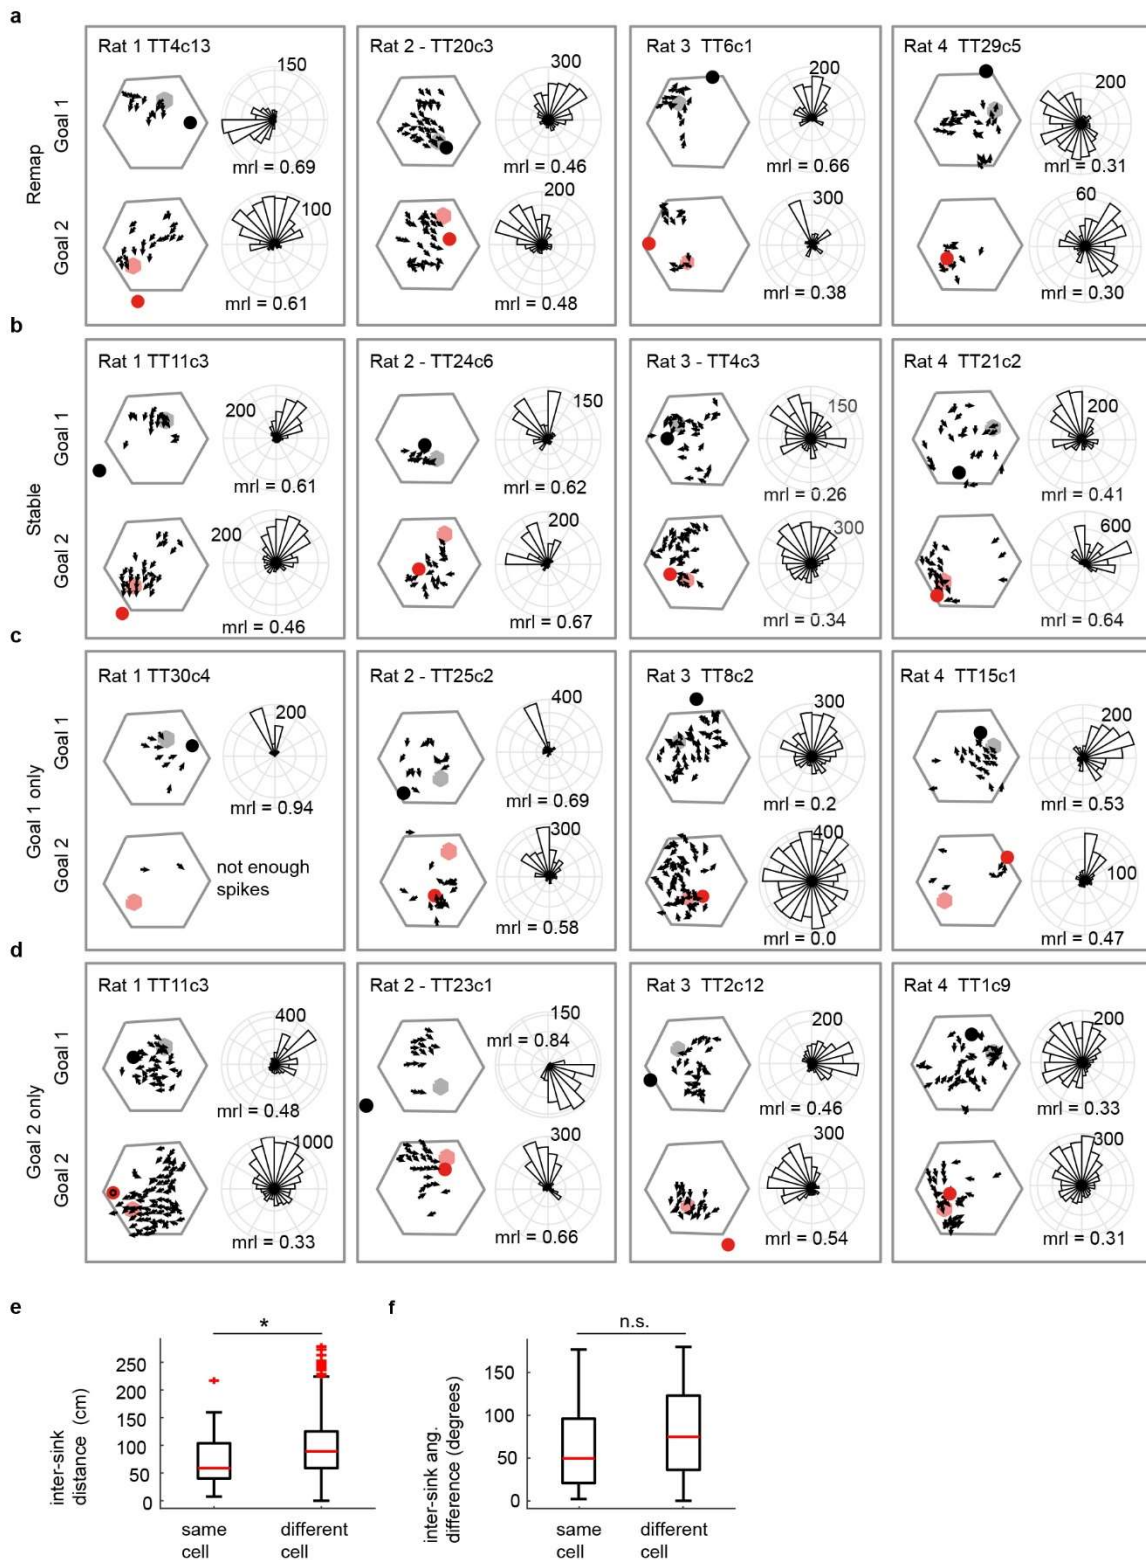

17

18 **Supplemental Figure 2 | Examples of ConSink cells recorded during the goal**

19 **switch sessions. a**, Example cells that were significantly modulated during both

20 Goal 1 and Goal 2 epochs, but whose ConSink changed position. Vector fields (left)

21 depict mean head direction at binned spatial locations. The ConSink and goal  
22 location depicted in black (Goal 1) or red (Goal 2). Right, Polar plot showing the  
23 distribution of head directions relative to the ConSink. **b**, As in **(a)**, but examples  
24 whose ConSink positions did not change. **c**, Examples of cells that were only  
25 significantly tuned during Goal 1. Where sufficient spikes were fired (min. 500), the  
26 best candidate ConSink position for Goal 2 is plotted. **d**, As in **(c)**, but examples that  
27 were only tuned during Goal 2. **e**, Distances between Goal 1 and Goal 2 sinks within  
28 cells that had sinks during both epochs (e.g. the cells shown in **(a)** and **(b)**) were  
29 smaller than those between all other possible pairs of Goal 1 and Goal 2 ConSink  
30 cells. Wilcoxon rank sum test, two-sided,  $n = 28$  cells (same cell) and 3024 cell pairs  
31 (different cell) from 4 animals,  $z = -2.41$ ,  $p = 0.016$ . **f**, Differences in mean direction  
32 between Goal 1 and Goal 2 sinks within cells that had sinks during both epochs (e.g.  
33 the cells shown in **(a)** and **(b)**) were smaller than those between all other possible  
34 pairs of Goal 1 and Goal 2 ConSink cells, but this difference was not significant  
35 (Wilcoxon rank sum test, two-sided,  $n = 28$  cells (same cell) and 3024 cell pairs  
36 (different cell) from 4 animals,  $z = -1.49$ ,  $p = 0.14$ ). Together, **(e)** and **(f)** suggest that  
37 sink position may not be solely dependent on the goal. For box plots in **(e)** and **(f)**,  
38 the central mark indicates the median, and the bottom and top edges of the box  
39 indicate the 25th and 75th percentiles, respectively; the whiskers extend to the most  
40 extreme data points within 1.5 times the interquartile range away from the bottom or  
41 top of the box, and all more extreme points are plotted individually using the '+'  
42 symbol.

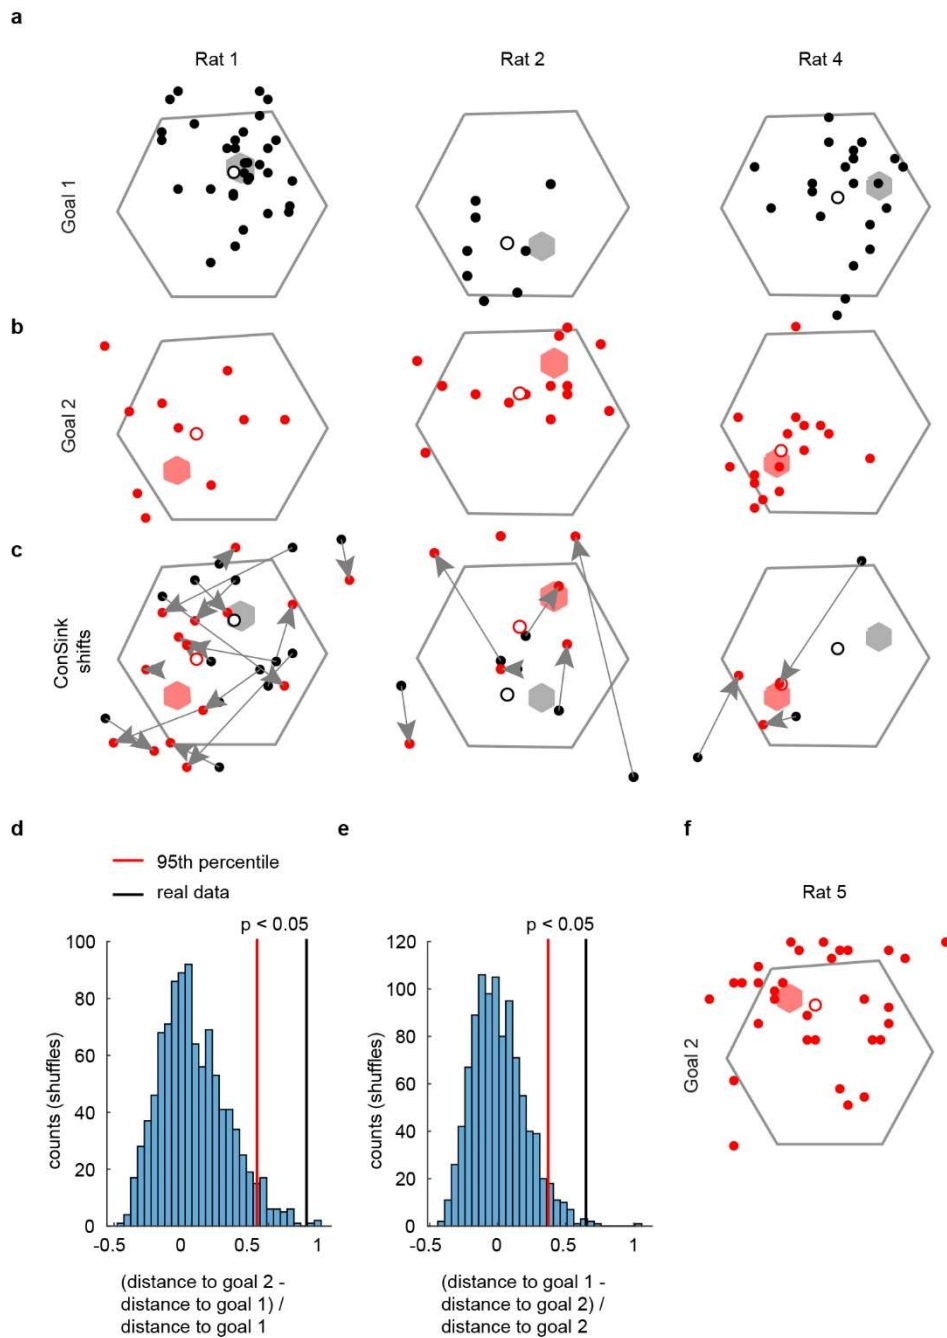

43

44 **Supplemental Figure 3 | ConSinks move towards the new goal in all recorded**

45 **animals. a**, Spatial distribution of ConSinks active only in Goal 1 (grey hexagon)

46 before the goal switch. Average ConSinks, open circles. **b**, Spatial distribution of

47 ConSinks active only in Goal 2 (red hexagon) after goal switch. **c**, Arrows show

48 movement of ConSinks from Goal 1 to Goal 2. **d**, During the Goal 1 epoch, the

49 difference in sink distance to Goal 2 relative to Goal 1 (normalized by distance to

50 Goal 1) was greater than for random pairs of platforms (Monte Carlo simulation,  
51 single-sided,  $p < 0.05$ ). **e**, Similarly, during the Goal 2 epoch, the difference in sink  
52 distance to Goal 1 relative to Goal 2 (normalized by distance to Goal 2) was also  
53 greater than for random pairs of platforms (Monte Carlo simulation, single-sided,  $p <$   
54  $0.05$ ). **f**, Spatial distribution of ConSinks in Rat 5 after multiple days of training to  
55 Goal 2 (red hexagon).

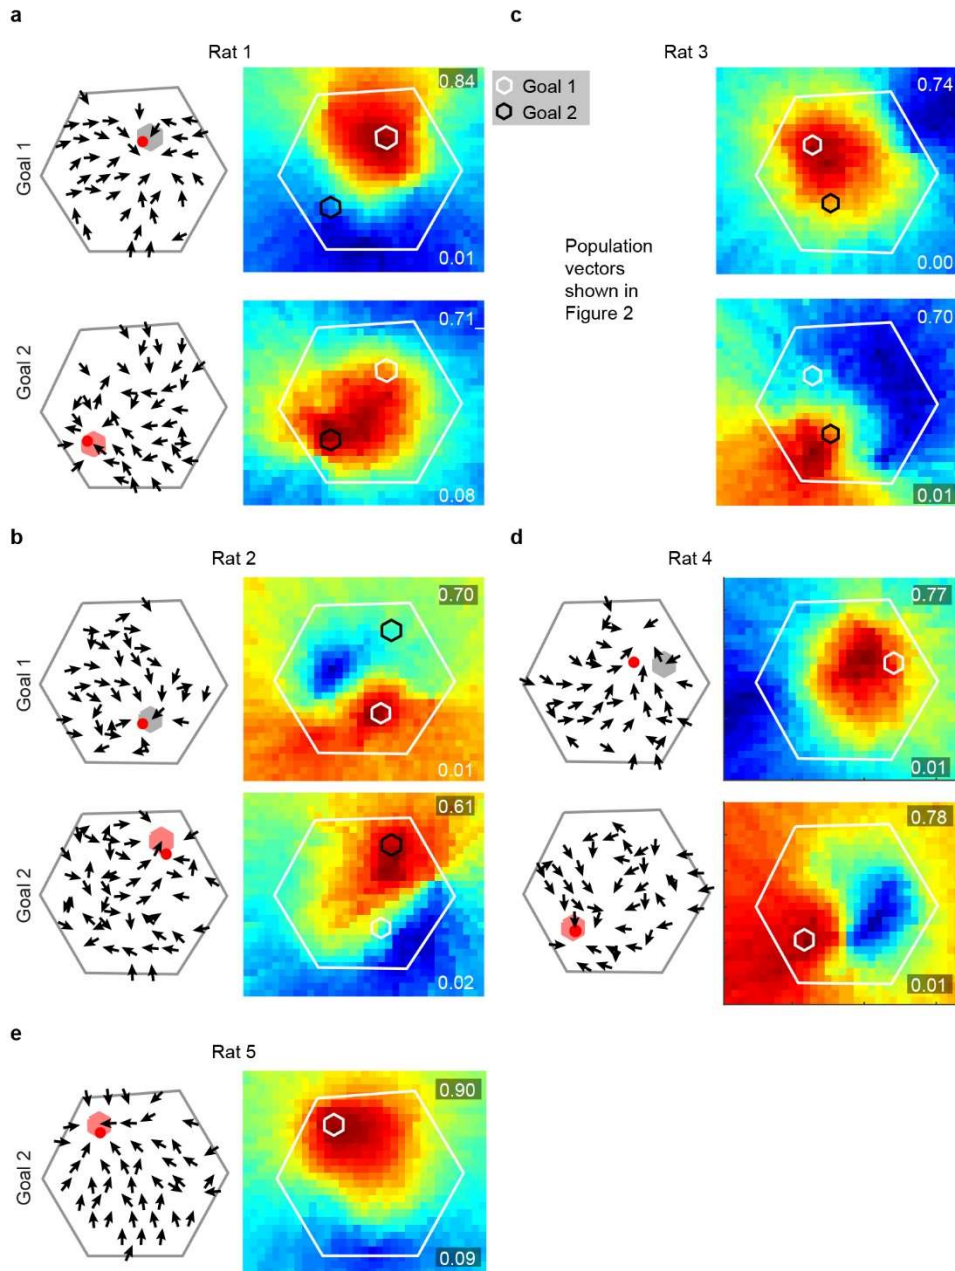

56

57 **Supplemental Figure 4 | MRL maps calculated from population vector fields**

58 **show stronger tuning to the current goal than the subsequent or previous**

59 **goal.** a, Population vector fields for Rat 1 (left), and MRL maps (right) calculated

60 from the population vector fields during Goal 1 (top) and goal 2 (bottom; these maps

61 are analogous to the single cell MRL map shown in Extended Data Figure 5b). The

62 MRL values shown in Fig. 2i are taken from the goal-centred locations in these

63 maps. **b-d**, as in (a) but for rats 2-4, respectively (note that rat 3's vector fields are



64 shown in Figure 2g and h). **e**, Population vector fields for Rat 5 (left), and MRL maps  
65 (right) recorded after multiple days training to Goal 2.

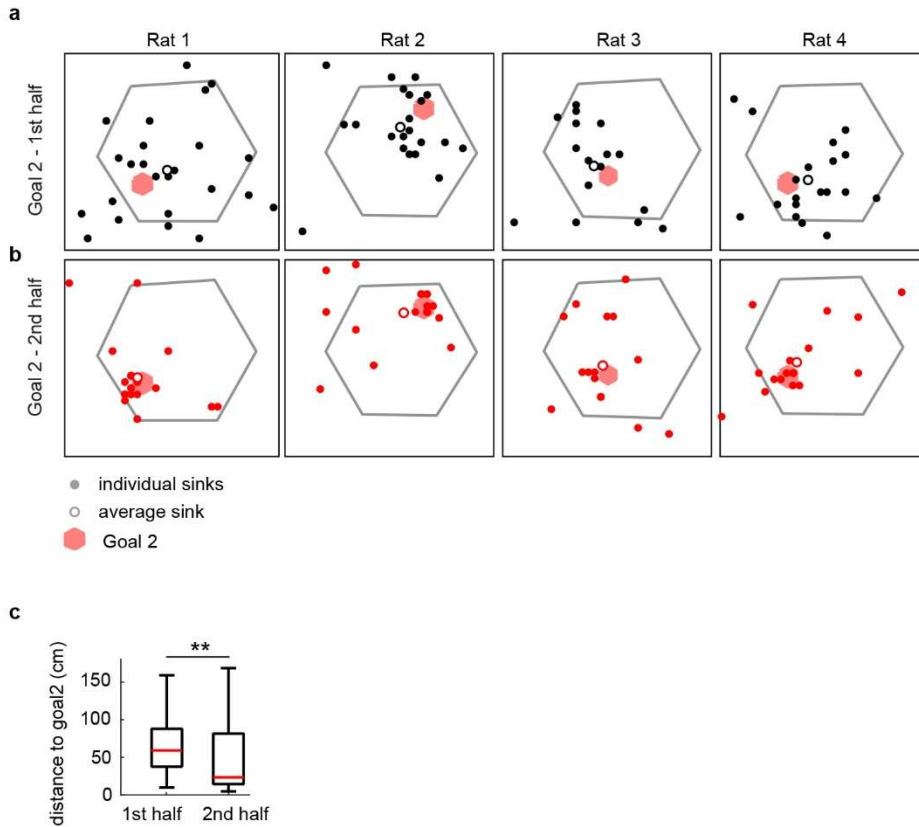

66

67 **Supplemental Figure 5 | Average ConSinks move towards the new goal with**  
 68 **additional trials.** Spatial distribution of ConSinks during the first (**a**) and second (**b**)  
 69 halves of Goal 2 training for each rat. Average ConSinks, open circles. **c**, ConSinks  
 70 moved closer to the new goal in the second half of training (Wilcoxon sign rank test,  
 71 two-sided,  $n = 80$  cells from 4 animals (note that 1 cell was excluded due to  
 72 insufficient number of spikes in 1 of the 2 halves),  $z = 3.35$ ,  $p = 1.90 \times 10^{-4}$ . For box  
 73 plots, the central mark indicates the median, and the bottom and top edges of the  
 74 box indicate the 25th and 75th percentiles, respectively; the whiskers extend to the  
 75 most extreme data points away from the bottom or top of the box).

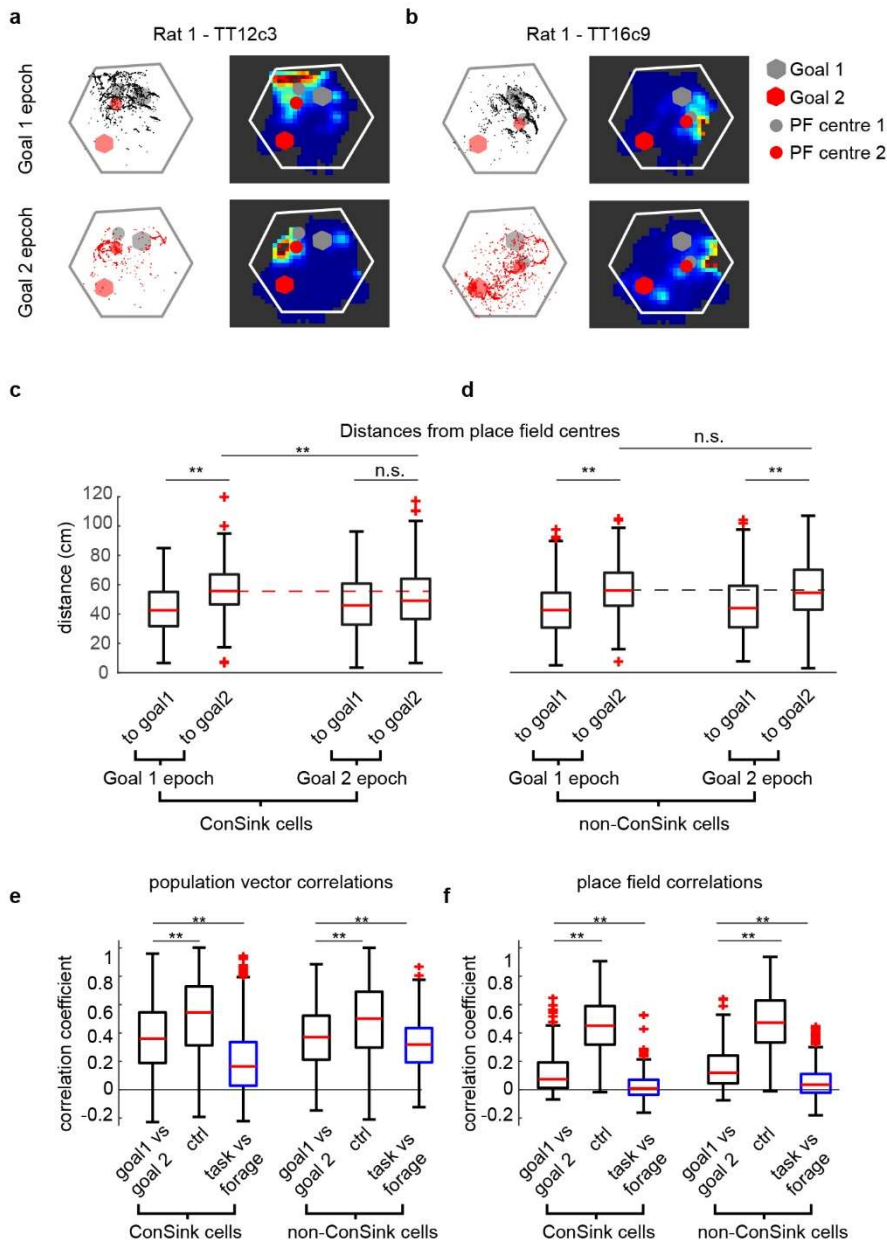

76

77 **Supplemental Figure 6 | Place fields do not show clustering around goal 2**

78 **after the goal switch.** **a**, Spike plots and rate maps from a representative ConSink  
 79 cell during Goal 1 and Goal 2 epochs. Note that the rate map centre of mass (place  
 80 field centre) shifts slightly towards Goal 2 after the goal switch, but remains closer to  
 81 Goal 1. **b**, A second representative example cell. Again, centre of mass shifts slightly  
 82 towards Goal 2 but remains closer to Goal 1. **c**, **d**, Summary of place field centre –  
 83 goal distance data. Note that results are similar for both ConSink (**c**) and non-

84 ConSink (**d**) cells; place field centres are initially closer to Goal 1 than to Goal 2, but,  
85 only in ConSink cells, they move towards Goal 2 after the goal switch. Wilcoxon rank  
86 sum test, two-sided, ConSink cells Goal 1 epoch, n = 157 cells from 4 animals, p =  
87  $2.65 \times 10^{-7}$ ; ConSink cells Goal 2 epoch, n = 155 cells from 4 animals, p = 0.095;  
88 ConSink cells Goal 1 epoch – goal2 vs Goal 2 epoch – goal 2, p =  $9.82 \times 10^{-4}$ ; non-  
89 ConSink cells Goal 1 epoch, n = 174 cells from 4 animals, p =  $2.30 \times 10^{-8}$ ; non-  
90 ConSink cells Goal 2 epoch, n = 193 cells from 4 animals, p =  $3.13 \times 10^{-5}$ ; non-  
91 ConSink cells Goal 1 epoch – goal2 vs Goal 2 epoch – goal 2, p = 0.79. No  
92 corrections made for multiple comparisons. **e, f**, Remapping in both ConSink (**e**) and  
93 non-ConSink (**f**) cells after the goal switch is less than is observed after the switch  
94 from honeycomb task to open field foraging. Remapping defined as significantly  
95 lower correlation than within control data; control data consists of session 1 (i.e.  
96 static goal) data split into first and second halves. Wilcoxon rank sum test, two-sided,  
97 population vector correlations: ConSink cells goal 1 vs goal 2, n = 1299 population  
98 vectors from 4 animals; ctrl, n = 2541 population vectors from 4 animals ; task vs  
99 forage, n = 1697 population vectors from 4 animals. “goal1 vs goal2” vs ctrl, p =  $1.31$   
100  $\times 10^{-56}$ ; “goal1 vs goal2” vs “task vs forage”, p =  $2.23 \times 10^{-79}$ ; non-ConSink cells goal  
101 1 vs goal 2, n = 1303 population vectors from 4 animals; ctrl, n = 2549 population  
102 vectors from 4 animals; task vs forage, n = 2062 population vectors from 4 animals;  
103 “goal1 vs goal2” vs ctrl, p =  $8.29 \times 10^{-47}$ ; “goal1 vs goal2” vs “task vs forage”, p =  
104  $7.19 \times 10^{-12}$ ; place field correlations, ConSink cells goal 1 vs goal 2, n = 162 cells  
105 from 4 animals; ctrl, n = 324 cells (each cell repeated twice, once from goal 1 and  
106 once from goal 2) from 4 animals; task vs forage, n = 143 cells from 4 animals.  
107 “goal1 vs goal2” vs ctrl, p =  $9.46 \times 10^{-48}$ ; “goal1 vs goal2” vs “task vs forage”, p =  
108  $1.40 \times 10^{-9}$ ; non-ConSink cells goal 1 vs goal 2, n = 199 cells from 4 animals; ctrl, n =

109 398 cells (each cell repeated twice, once from goal 1 and once from goal 2) from 4  
110 animals; task vs forage, n = 309 cells from 4 animals. “goal1 vs goal2” vs ctrl, p =  
111  $1.22 \times 10^{-54}$ ; “goal1 vs goal2” vs “task vs forage”, p =  $1.17 \times 10^{-14}$ . No corrections  
112 made for multiple comparisons. \*\* indicates  $p < 0.001$ . For box plots in (c-f), the  
113 central mark indicates the median, and the bottom and top edges of the box indicate  
114 the 25th and 75th percentiles, respectively; the whiskers extend to the most extreme  
115 data points within 1.5 times the interquartile range away from the bottom or top of the  
116 box, and all more extreme points are plotted individually using the '+' symbol.

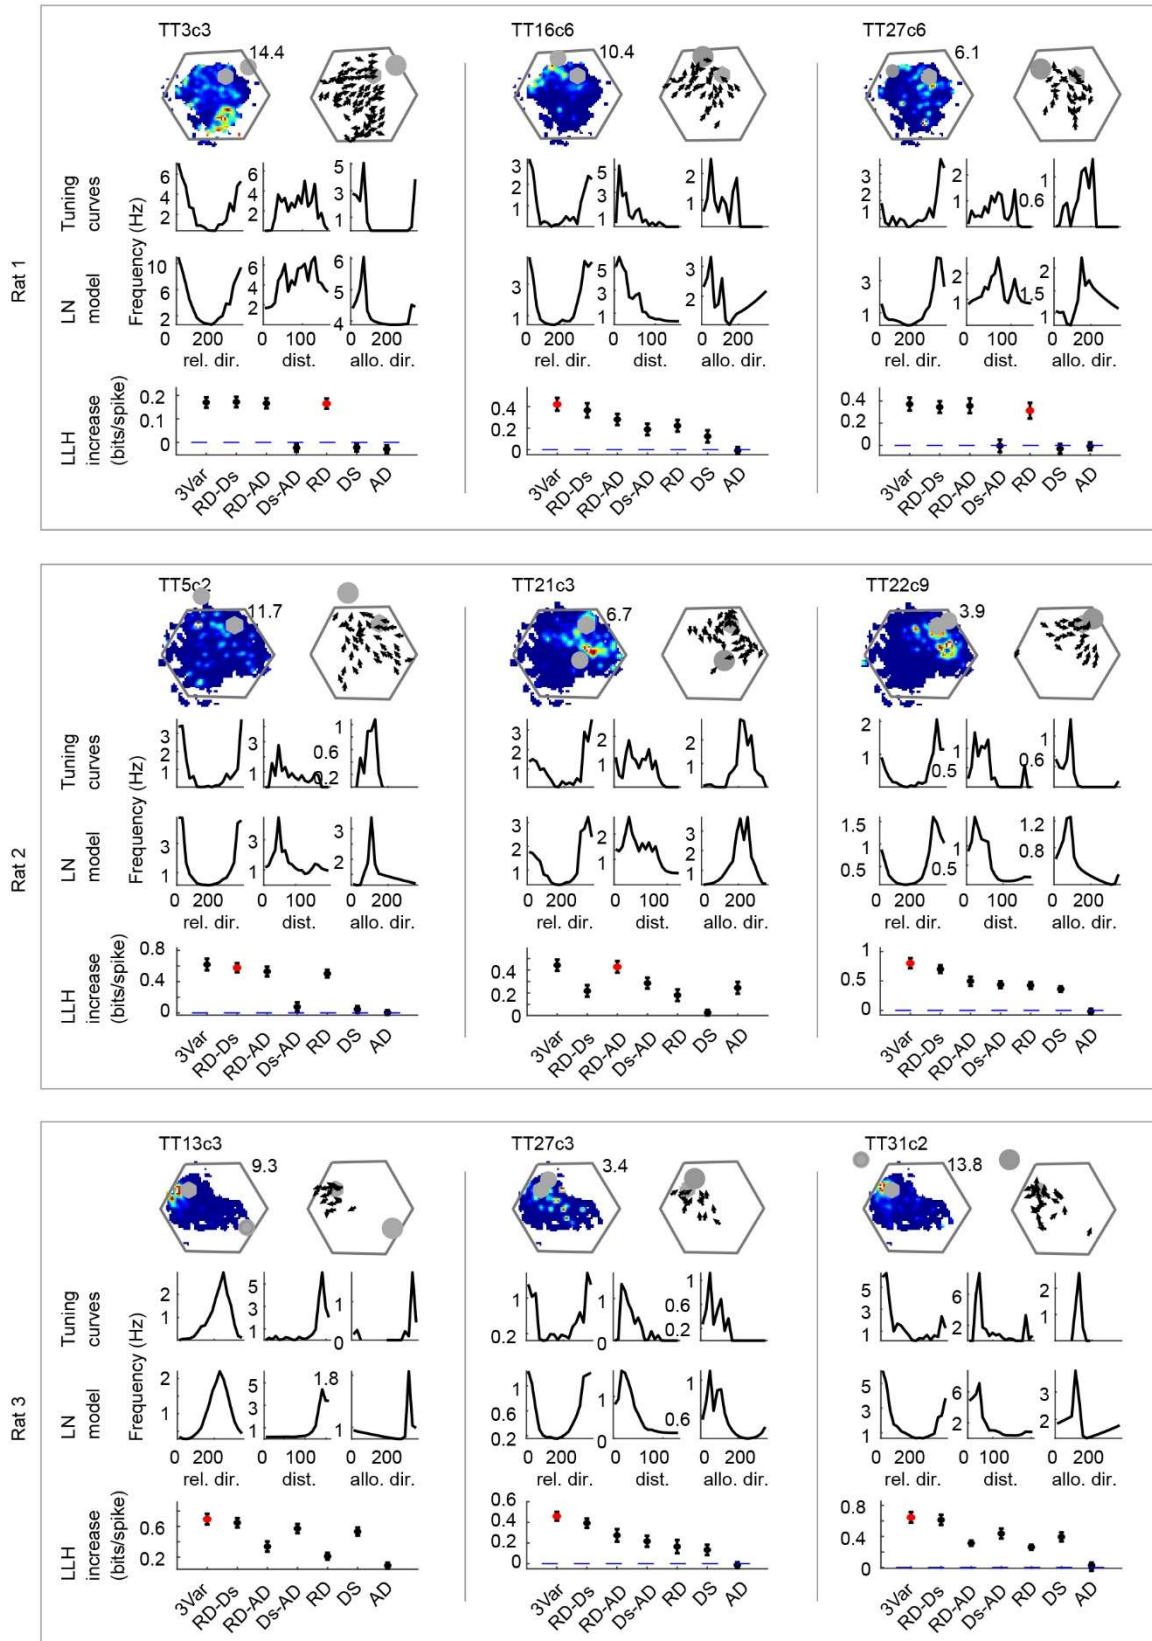

118 **Supplemental Figure 7 | Representative examples of LN model results.** The LN  
119 model analysis found that ConSink cells significantly encoded various combinations  
120 of relative direction, allocentric direction, and distance to the sink. Plots for individual  
121 cells show each cell's rate map (top left) with the goal (grey hexagon) and ConSink  
122 (grey closed circle) and the peak firing rate (to the top right of the rate map; the  
123 vector field (top right) showing spike-associated allocentric head direction by spatial  
124 position; tuning curves for relative direction, distance, and allocentric direction to the  
125 sink (second row, from left to right); the LN model response profiles (third row); the  
126 log likelihood increase in information about the firing rate for each nested LN model  
127 (3VAr indicates the model incorporating all 3 variables; RD, relative direction; Ds,  
128 distance; AD, allocentric direction). The significant model (i.e. the highest order  
129 model that produces a significant increase in information over the next lower-ordered  
130 model) is indicated in red (n = 10 repeats of the cross-validation procedure; error  
131 bars = s.e.m.).

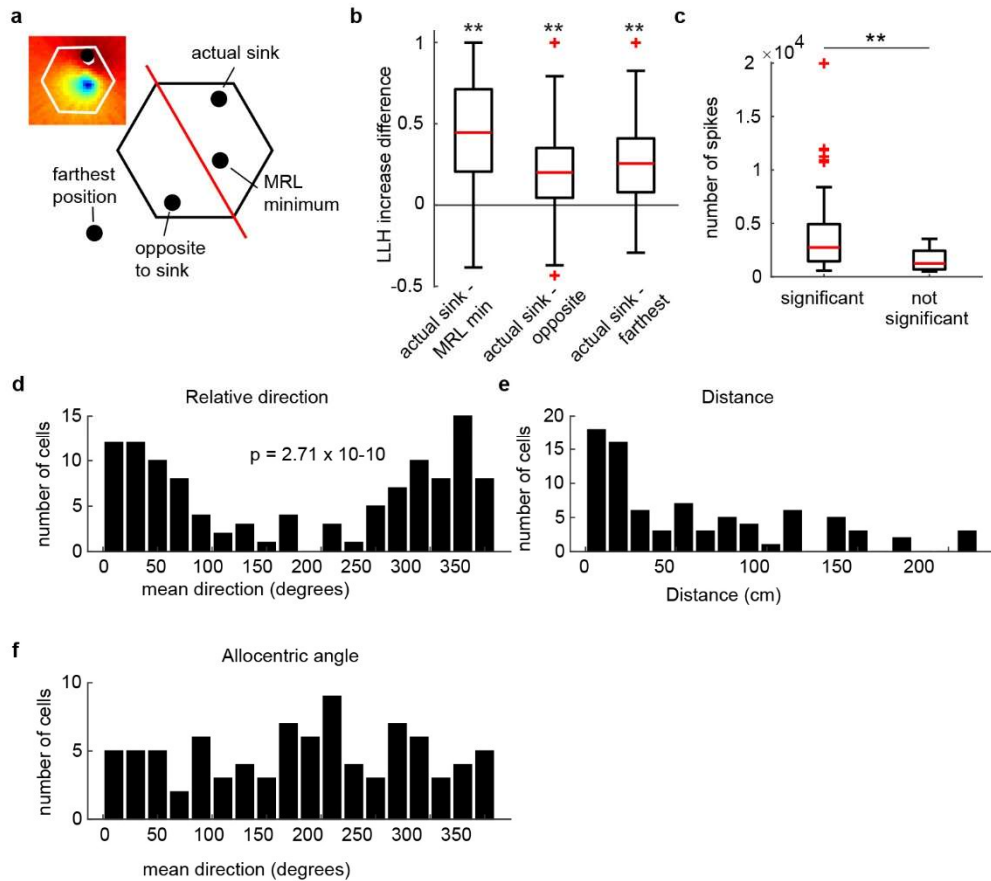

132

133 **Supplemental Figure 8 | Testing validity of LN model results. a**, To test the  
 134 validity of the LN model results, we recalculated the log-likelihood (LLH) increase in  
 135 spike prediction using 3 non-sink control positions: first, we took the position of least  
 136 tuning (i.e. MRL minimum; see inset, which is reproduced from Extended Data Fig.  
 137 5b, blue position), second, the sink position reflected across the x and y axes  
 138 (opposite to sink), and last, the farthest distance in the field of view from the sink  
 139 position. **b**, We calculated the difference between the LLH increase using the real  
 140 sinks and using these 3 control sinks. The model provided significantly less  
 141 information about a given ConSink cell's spiking when using any of these positions  
 142 rather than the identified sink position itself (Wilcoxon signed-rank test, two-sided,  $n$   
 143 = 119 cells from 5 animals,  $z$  (from left to right) = 8.96, 7.75, 8.57;  $p$  (from left to  
 144 right) =  $3.38 \times 10^{-19}$ ,  $9.49 \times 10^{-15}$ ,  $1.08 \times 10^{-17}$ ). **c**, Cells not found significant by the



145 LN analysis fired fewer spikes than significant cells. Wilcoxon rank sum test,  $n = 123$   
146 significant cells, 19 not significant cells from 5 animals,  $p = 3.39 \times 10^{-4}$ . **d**, Relative  
147 direction, **e**, Distance, and **f**, Allocentric angle are well represented across the  
148 spectrum of possible values. Note that the circular distribution in (**d**) is significantly  
149 non-uniform ( $p = 2.71 \times 10^{-10}$ ), as expected (see Fig. 1j). Plots show the population  
150 of peak values taken from the subset of ConSink cells found significant for the  
151 respective spatial variable. For box plots in (**b**) and (**c**), the central mark indicates the  
152 median, and the bottom and top edges of the box indicate the 25th and 75th  
153 percentiles, respectively; the whiskers extend to the most extreme data points within  
154 1.5 times the interquartile range away from the bottom or top of the box, and all more  
155 extreme points are plotted individually using the '+' symbol.

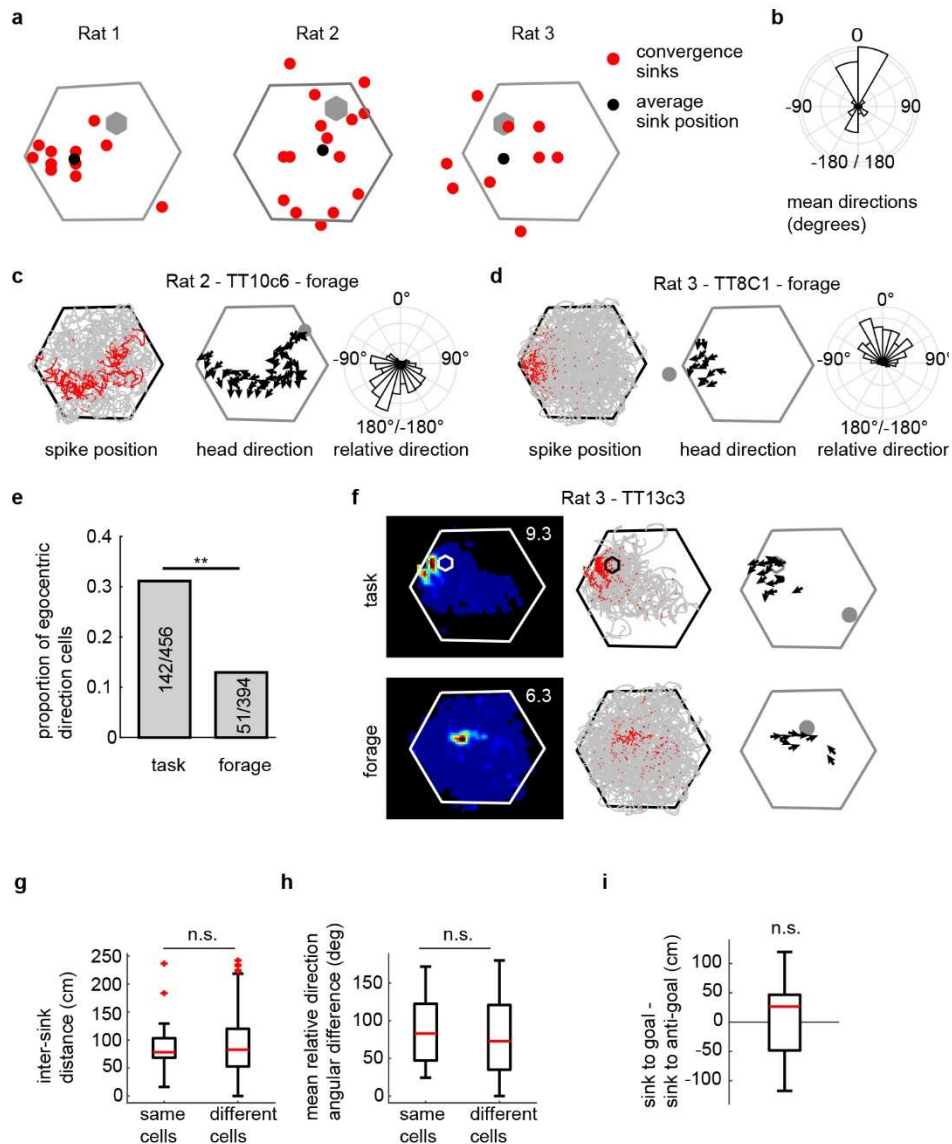

156

157 **Supplemental Figure 9 | ConSinks during open field foraging are fewer and**  
 158 **not clustered.** **a**, Distribution of ConSinks and average ConSink for animals 1 to 3.  
 159 **b**, Average heading direction relative to the ConSink across all animals. **c**, **d**,  
 160 Representative examples of ConSink cells during foraging. Left, paths (grey) and  
 161 spikes (red). Middle, vector field depicts mean head direction at binned spatial  
 162 positions; ConSink is shown as grey filled circle. Right, Polar plot showing the  
 163 distribution of spike-associated head directions relative to the ConSink. **e**, More than  
 164 twice as many place cells were significant for ConSink tuning during navigation

165 compared to foraging (Chi-square test,  $X^2 = 39.9$ ,  $p = 2.71 \times 10^{-10}$ ). **f**, Example of a  
166 Ca1 place cell with significant ConSinks during both navigation and foraging; note  
167 differences in field location, vector fields, and ConSink location. Peak firing rate is  
168 indicated at top right of rate map (left-most panel). **g**, The convergence sinks for the  
169 task and forage tasks were no closer within cells that were significantly modulated  
170 during both tasks than they were across cells significantly modulated during either  
171 tasks, indicating a reorganization between the two epochs ( $n = 13$  (same cells), 1833  
172 (different cells) from 5 animals, Wilcoxon rank sum test, two-sided,  $z = 0.081$ ,  $p =$   
173  $0.936$ ). **h**, The same lack of a difference held for the preferred relative directions ( $n =$   
174  $13$  (same cells), 1833 (different cells) from 5 animals, Wilcoxon rank sun test, two-  
175 sided,  $z = 0.75$ ,  $p = 0.452$ ). **i**, ConSinks during foraging were no closer to the  
176 honeycomb task goals than to symmetrical locations on the opposite side of the  
177 maze ( $n = 51$  cells from 5 animals, Wilcoxon signed rank test, two-sided,  $z = 0.52$ ,  $p$   
178  $= 0.600$ ; see Extended Data Fig. 6 for anti-goal positions). For box plots in (**g-i**), the  
179 central mark indicates the median, and the bottom and top edges of the box indicate  
180 the 25th and 75th percentiles, respectively; the whiskers extend to the most extreme  
181 data points within 1.5 times the interquartile range away from the bottom or top of the  
182 box, and all more extreme points are plotted individually using the '+' symbol.

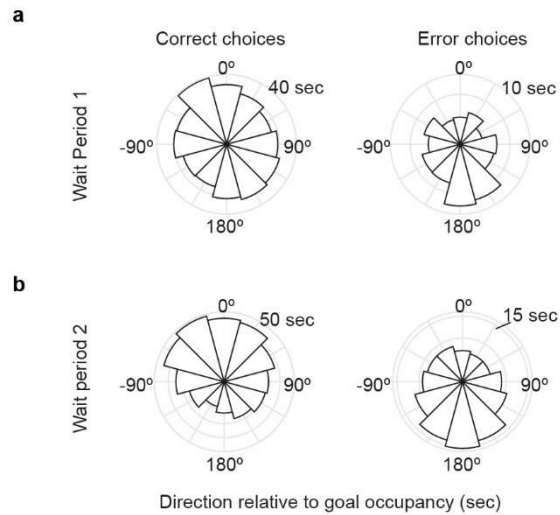

183

184 **Supplemental Figure 10 | Behavioural orientations during correct and error**

185 **choices. a**, The time spent oriented towards the goal in each possible orientation,  
 186 averaged across the 3 animals, during Wait Period 1, which occurred after the  
 187 previous platforms had lowered but before the next choice platforms were raised.

188 Note the relatively uniform distribution during correct choices, while during errors, the  
 189 animals orient away from goal (Rayleigh test for non-uniformity, Correct choices,  $z =$   
 190  $0.42$   $p = 0.66$ , Error choices,  $z = 2.59$ ,  $p = 0.075$ ). **b**, As in (a), but for Wait Period 2,  
 191 which we define as the 4 seconds preceding the animals movement onto the Choice  
 192 platform (Rayleigh test for non-uniformity, Correct choices,  $z = 14.23$ ,  $p = 5.99 \times 10^{-7}$ ,  
 193 Error choices,  $z = 4.42$ ,  $p = 0.017$ ).

194

195 **Supplemental Video 1 | Firing of neuron TT18c1 from Rat 2 during Trial 7 from**  
196 **Session 1.** Note that the cell's convergence sink is shown as a red filled circle near  
197 the top of the screen. Spikes are indicated by smaller filled circles whose colour  
198 indicates relative firing rate (cold colours, lower; hot colours, higher). Firing rate is  
199 also indicated at lower right.
